# Supplementary material for: Applying Deep Reinforcement Learning to Cable Driven Parallel Robots for Balancing Unstable Loads: A Ball Case Study
Source: Front Robot AI. 2021 Feb 22;7:611203. doi: 10.3389/frobt.2020.611203 (PMC7938313; doi:10.3389/frobt.2020.611203)
Supplement: Supplementary file 1 [file table1.docx]

| **Table 1. Showing workspace reference frame variables.** | |
| --- | --- |
| Platform X Displacement:  Platform Y Displacement:  Platform Z Displacement:  Platform Displacement Vector:  Platform X Velocity:  Platform Y Velocity:  Platform Z Velocity:  Platform Velocity Vector: | Platform X Rotation:  Platform Y Rotation:  Platform Rotation Vector:  Platform X Angular Velocity:  Platform Y Angular Velocity:  Platform Angular Velocity Vector: |
| Cable Workspace Origins Matrix:  Cable Lengths Matrix: | |
